# Supplementary material for: Sustainable and facile synthesis of high-performance nitrogen-doped carbon/graphene@LiFePO4 cathode materials from spent LiFePO4
Source: Royal Society of Chemistry journal article supplement (doi:10.1039/d4nj00538d), 2024-01-01
Supplement: d4nj00538d1.pdf [file d4nj00538d1.pdf]

Electronic Supplementary Material (ESI) for New Journal of Chemistry.

## Supporting Information

Sustainable and facile synthesis of high-performance nitrogen-doped carbon/graphene@LiFePO<sub>4</sub> cathode materials from spent LiFePO<sub>4</sub>

Bo Wang,<sup>\*a,b</sup> Yue Li,<sup>a,b</sup> Xiaoli Zhu,<sup>a</sup> Fengyan Guo,<sup>a</sup> Dingpei Zhang,<sup>a</sup> and Hui Wang,<sup>c</sup>

<sup>a</sup> *School of New Materials and Chemical Engineering, Tangshan University, Tangshan 063000, P. R. China.*

<sup>b</sup> *Key Laboratory of Fine Chemical industry in Tangshan City, Tangshan University, Tangshan 063000, P. R. China*

<sup>c</sup> *HeBei LingDian New Energy Technology Co., Ltd, Tangshan 063000, P. R. China*

\* Corresponding author. Tel: +86-315-2010649; Fax: +86-315-2010649.

E-mail address: [wangbo@buaa.edu.cn](mailto:wangbo@buaa.edu.cn).

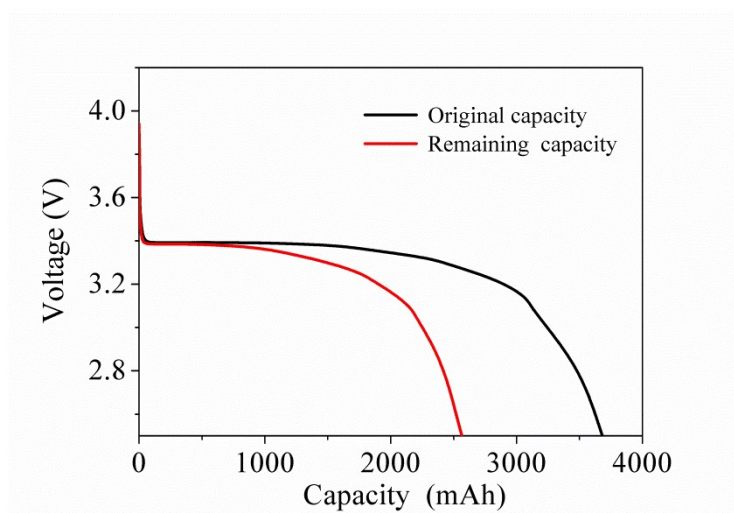

**Fig. S1** The remaining and original discharge curves of the 26,650-type spent batteries in the range of 2.5 to 4.2 V at 0.5 C rate. The remaining and original discharge capacities are 2564.86 and 3681.45 mAh, respectively.

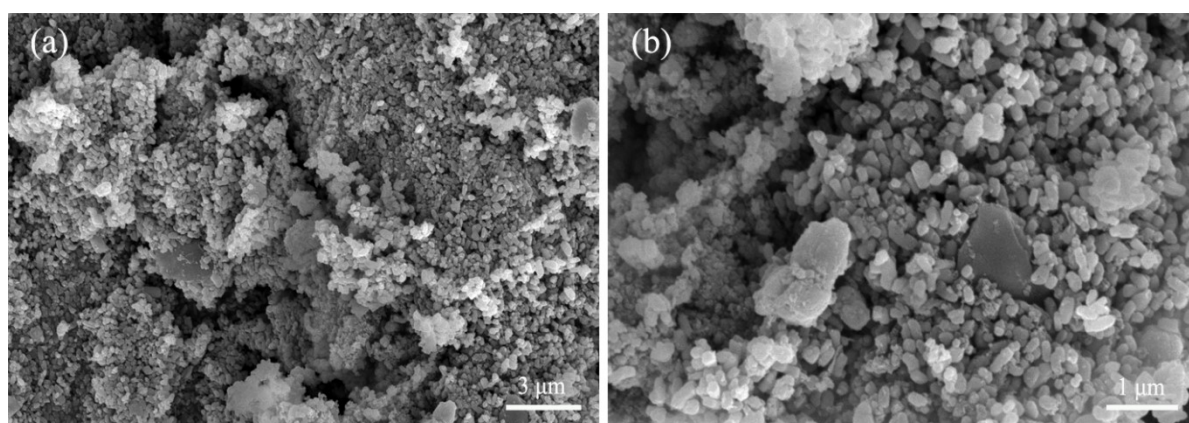

**Fig. S2** SEM images of the s-LFP at various magnifications.

**Table S1** The elemental composition of the as-synthesized N-DC/G@LPF composites from the EDS (Fig. 2d) .

| Element | Weight (%) | Atomic (%) |
|---------|------------|------------|
| C       | 17.92      | 31.38      |
| O       | 33.38      | 43.19      |
| N       | 1.27       | 2.38       |
| Fe      | 30.25      | 11.39      |
| P       | 17.18      | 11.66      |

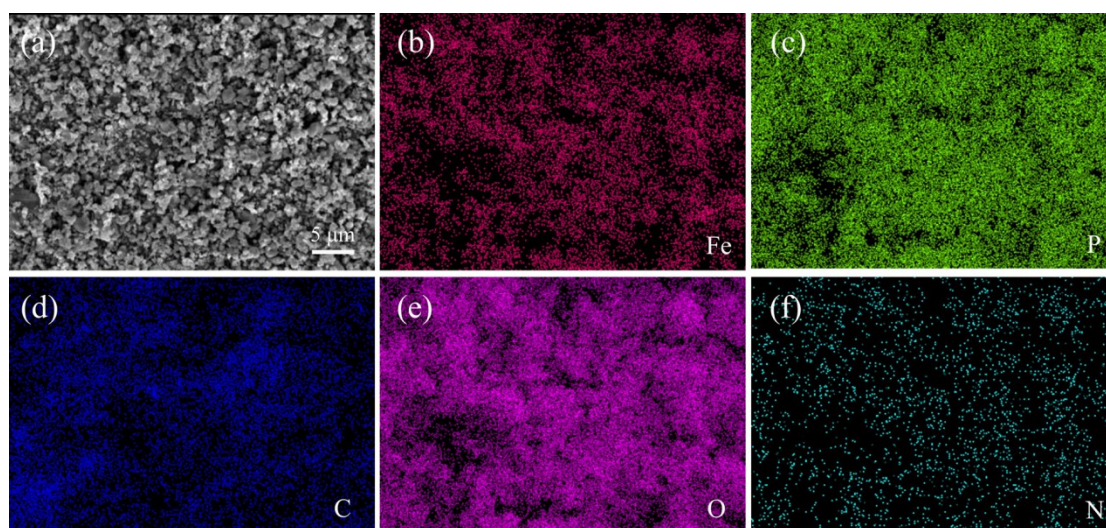

**Fig. S3** (a) SEM image of the N-DC/G@LPF composites; corresponding EDX elemental mapping of (b) iron, (c) phosphorus, (d) carbon, (e) oxygen, and (f) nitrogen.

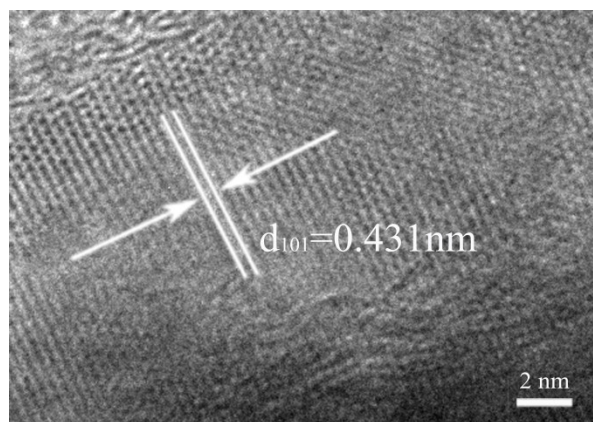

**Fig. S4** The partial enlarged HR-TEM images of the N-DC/G@LPF nanocomposites.

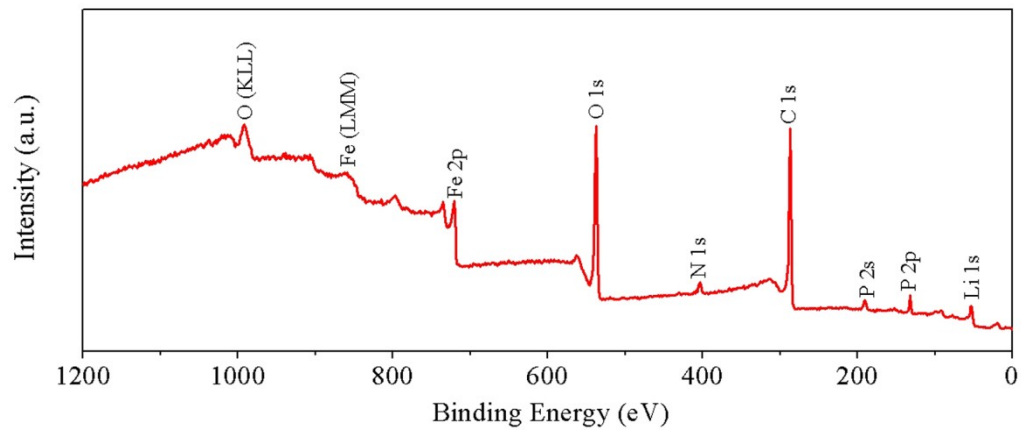

**Fig. S5** Full spectrum of XPS survey of N-DC/G@LPF nanocomposites.

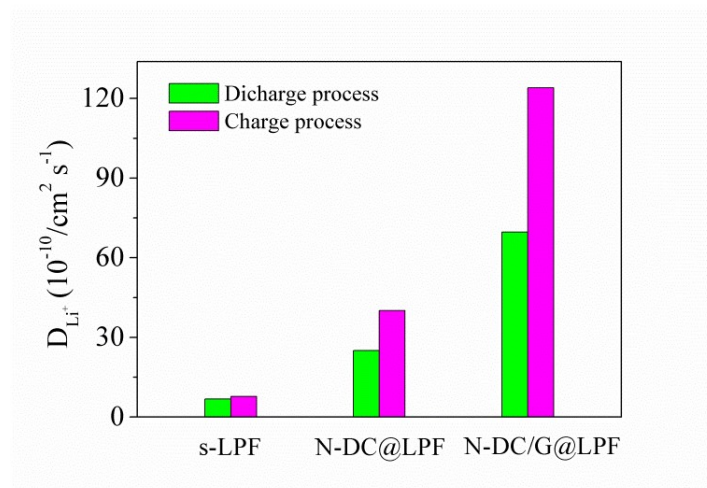

**Fig. S6** The Li<sup>+</sup> ions diffusion coefficients calculated by Randles-Sevcik equation for all electrodes.

**Table S2.** Comparison of electrochemical performance of the N-DC/G@LFP in this work with some other carbon-coated LFP materials reported in previous literatures.

| Type of material                                                  | Charge specific capacity (mAh g <sup>-1</sup> ) | Current density (mA g <sup>-1</sup> ) | Cycle number (n) | Reference |
|-------------------------------------------------------------------|-------------------------------------------------|---------------------------------------|------------------|-----------|
| LFP/C composites                                                  | 131.5                                           | 0.1 C                                 | 100              | 1         |
| S-modified reduced graphene oxide modified LiFePO <sub>4</sub> /C | ~150                                            | 0.2 C                                 | 100              | 2         |
| LFP/rGO nanocomposite                                             | 128.03                                          | 0.1 C                                 | 50               | 3         |
| LFP@ZC composites                                                 | 151                                             | 0.1C                                  | 100              | 4         |
| LiFePO <sub>4</sub> /C composites                                 | 143.5                                           | 0.2C                                  | 100              | 5         |
| N-DC/G@LFP cathode materials                                      | 149.3                                           | 0.2 C                                 | 500              | This work |

## References

- 1 X.Y. Liu, R.P. Zhao, Y.J. Xia, Q. Li, *Ionics*, 2022, **28**, 4579-4585.
- 2 Z.-L. Chen, Y.-J. Gu, G.-Y. Luo, Y.-L. Huo and F.-Z. Wu, *Ionics*, 2022, **28**, 191-200.
- 3 E. Suarso, F. A. Setyawan, A. Subhan, M. Mahyiddin Ramli, N. Syakimah Ismail, M. Zainuri, Z. Arifin and Darminto, *J Mater Sci: Mater Electron.*, 2021, **32**, 28297-28306.
- 4 Z. Jiang, S. Li, J. Lu, J. Du, Y. Tao, Y. Cheng and H. Wang, *J. Alloy. Compd.*, 2023, **937**, 168402.
- 5 Q. Sun, X. Li, H. Zhang, D. Song, X. Shi, J. Song, C. Li and L. Zhang, *J. Alloys Compd.*, 2020, **818**, 153292.
